# Supplementary material for: Conformational stability and activity analysis of two hydroxymethylbilane synthase mutants, K132N and V215E, with different phenotypic association with acute intermittent porphyria
Source: PubMed Central journal article supplement (PMC3738108; doi:10.1042/bsr20130045), 2013-08-08
Supplement: bsr033e056add.pdf [file bsr033e056add.pdf]

## SUPPLEMENTARY DATA

# Conformational stability and activity analysis of two hydroxymethylbilane synthase mutants, K132N and V215E, with different phenotypic association with acute intermittent porphyria

Helene J. BUSTAD\*<sup>†1</sup>, Marta VORLAND<sup>‡</sup>, Eva RØNNESETH<sup>‡</sup>, Sverre SANDBERG<sup>†</sup>, Aurora MARTINEZ\* and Karen TOSKA<sup>‡</sup>

\*Department of Biomedicine, University of Bergen, 5009 Bergen, Norway, <sup>†</sup>Department of Global Public Health and Primary Care, University of Bergen, 5009 Bergen, Norway, and <sup>‡</sup>Norwegian Porphyria Centre (NAPOS), Laboratory of Clinical Biochemistry, Haukeland University Hospital, 5021 Bergen, Norway

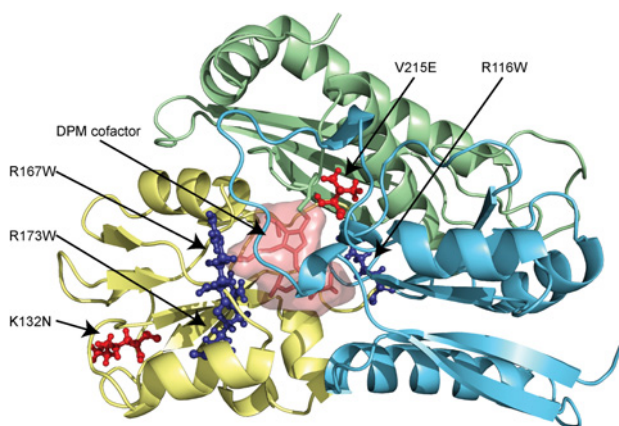

**Figure S1 Structural model of HMBS**

The location of the two novel mutations studied in this work, K132N and V215E, are presented as ball-and-sticks in red, whereas the three previously reported mutations (R116W, R167W and R173W) are presented as ball-and-sticks in dark blue. The complete structural model of HMBS was constructed with Modeller [1] based on multiple templates (PDB IDs: 1AH5, 1PDA, 1GTK, 1YPN, 3ECR and 3EQ1). Coordinates for residues 55–75 have been issued to loop optimization constructing a large set of possible confirmations. The lowest energy structure was chosen, and further refined with energy minimization using Amber 10 [2].

## REFERENCES

- 1 Fiser, A. and Sali, A. (2003) Modeller: generation and refinement of homology-based protein structure models. *Methods Enzymol.* **374**, 461–491
- 2 Case, D. A., Cheatham, 3rd, T. E., Darden, T., Gohlke, H., Luo, R., Merz, Jr, K. M., Onufriev, A., Simmerling, C., Wang, B. and Woods, R. J. (2005) The Amber biomolecular simulation programs. *J. Comput. Chem.* **26**, 1668–1688

Received 19 April 2013/23 May 2013; accepted 29 May 2013

Published as Immediate Publication 2 July 2013, doi 10.1042/BSR20130045

<sup>1</sup> To whom correspondence should be addressed (email helenejbustad@gmail.com).
